# Supplementary material for: 20.4% Power conversion efficiency from albedo-collecting organic solar cells under 0.2 albedo
Source: PubMed Central journal article supplement (PMC11529706; doi:10.1126/sciadv.adp9439), 2024-11-01
Supplement: sciadv.adp9439_sm.pdf [file sciadv.adp9439_sm.pdf]

Supplementary Materials for  
**20.4% Power conversion efficiency from albedo-collecting organic  
solar cells under 0.2 albedo**

Hao Ren *et al.*

Corresponding author: Jian-Xin Tang, [jxtang@must.edu.mo](mailto:jxtang@must.edu.mo); Jing-De Chen, [jdchen@suda.edu.cn](mailto:jdchen@suda.edu.cn);  
Yan-Qing Li, [yqli@phy.ecnu.edu.cn](mailto:yqli@phy.ecnu.edu.cn)

*Sci. Adv.* **10**, eadp9439 (2024)  
DOI: 10.1126/sciadv.adp9439

**This PDF file includes:**

Figs. S1 to S17  
Tables S1 to S5

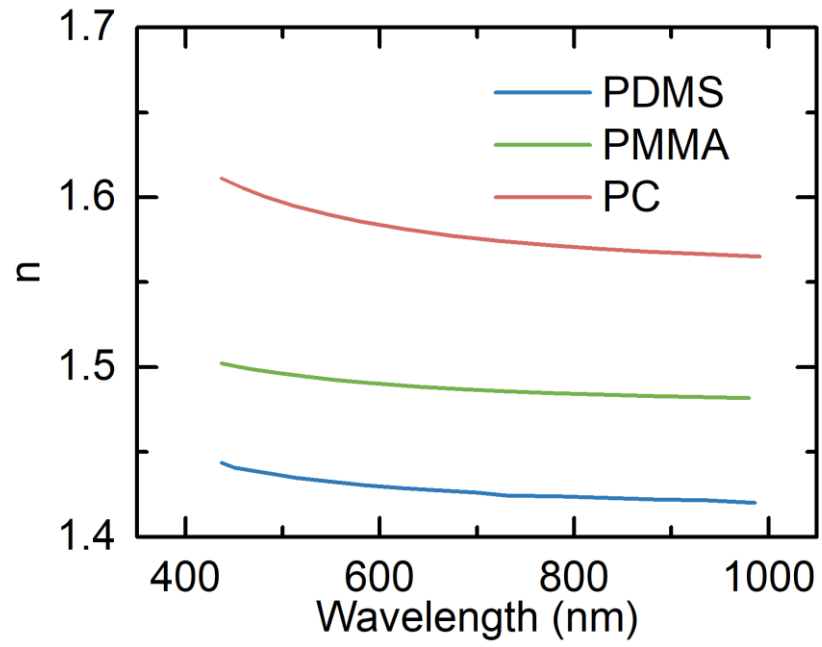

**Fig. S1. Impact of materials selection on refractive index.** Refractive index of PDMS, PMMA, and PC.

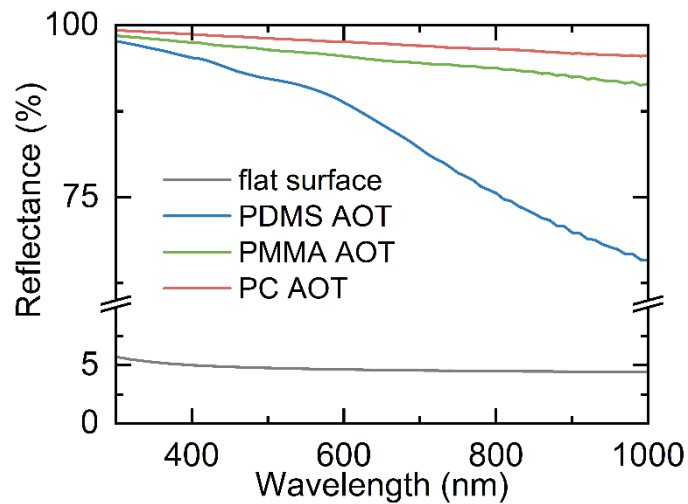

**Fig. S2. Impact of transparent material on reflectance.** Simulated reflection spectra of flat surface and AOTs based on various transparent materials.

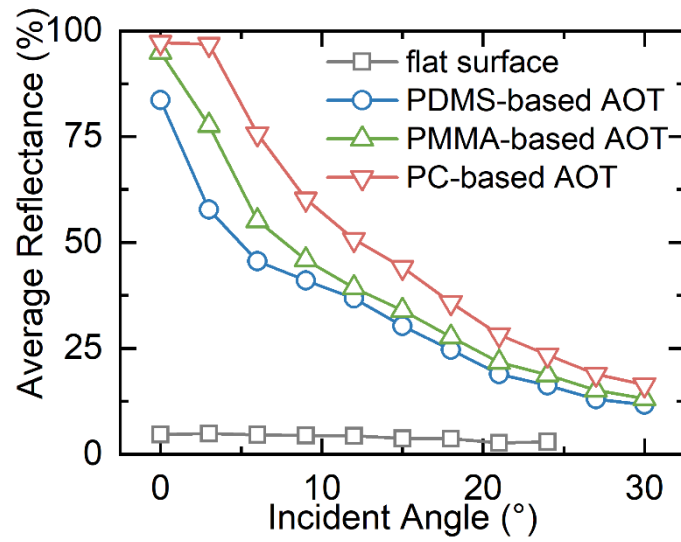

**Fig. S3. Impact of transparent material on reflectance.** Simulated average reflectance of flat surface and AOTs versus the angle of incidence.

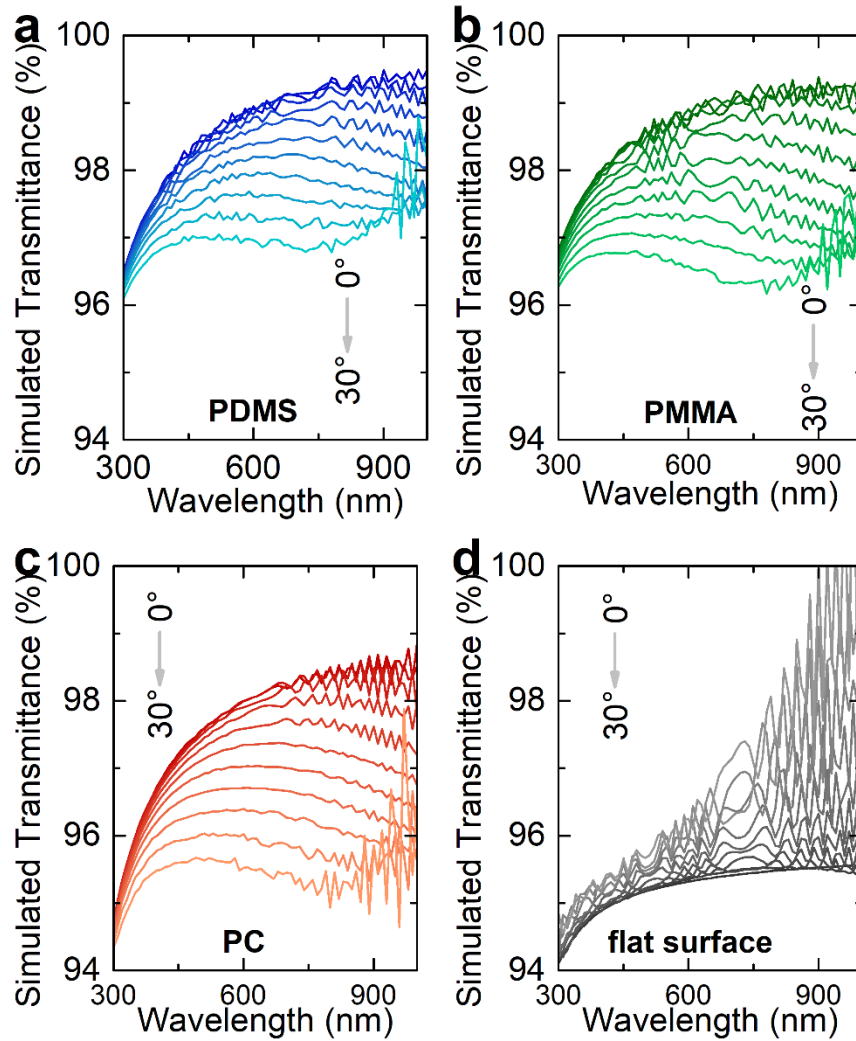

**Fig. S4. Impact of transparent material on transmittance.** Simulated transmission spectra of (a) PDMS- based AOT, (b) PMMA- based AOT, (c) PC-based AOT, and (d) flat surface at different incident angles and wavelength under rear illumination.

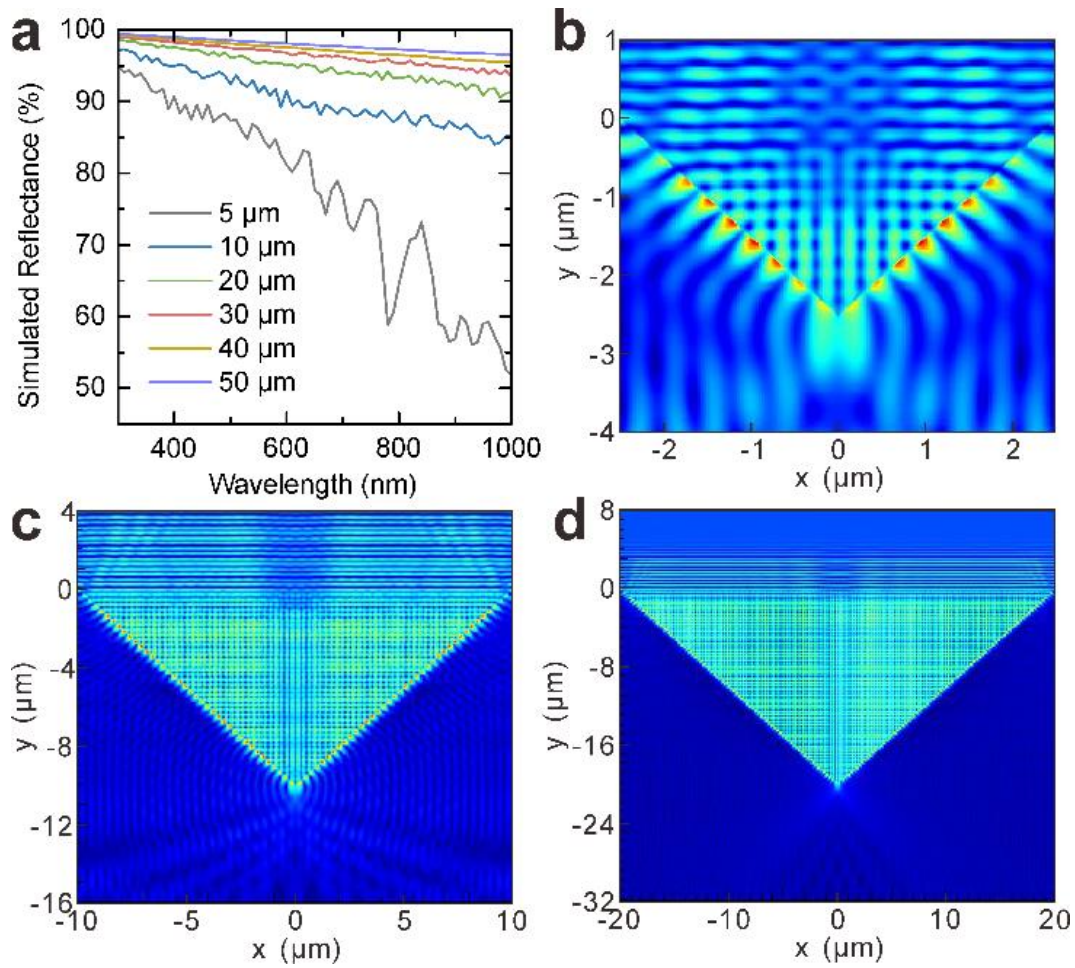

**Fig. S5. Impact of pyramid on optical property of PC-based AOT.** (a) Simulated reflection spectra PC-based AOT with different periods. Simulated electric field distribution profiles of PC-based AOT based on pyramid array with period of (b) 5 μm, (c) 20 μm, and (d) 40 μm.

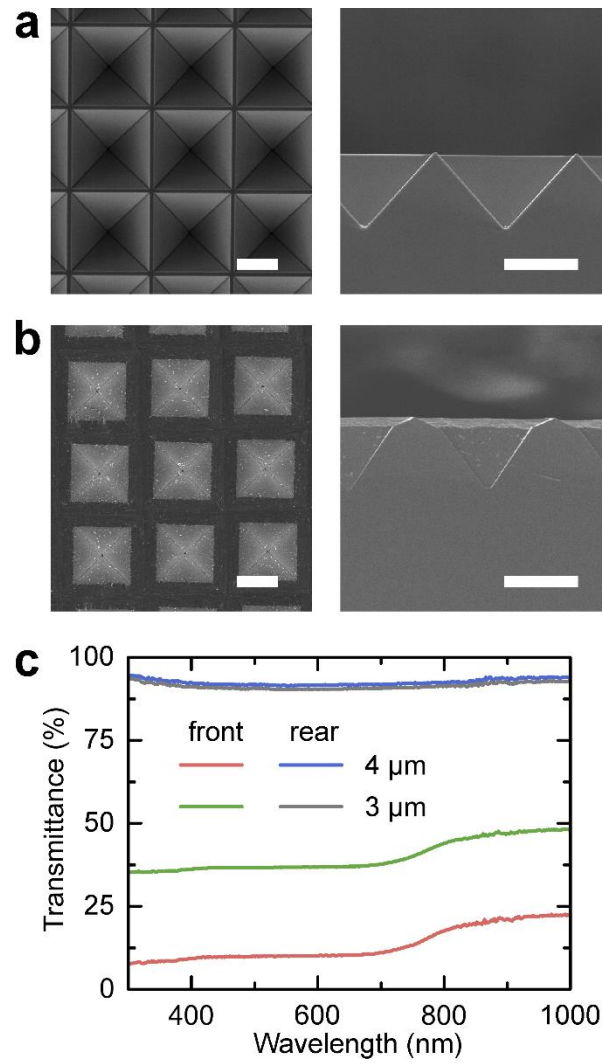

**Fig. S6. Measurements of silicon mold with different width.** Top-view and cross-sectional SEM images of silicon mold processed using shadow masks with width of (a) 4  $\mu\text{m}$  and (b) 3  $\mu\text{m}$ . (c) Transmission spectra of AOT processed with reduced width of shadow mask.

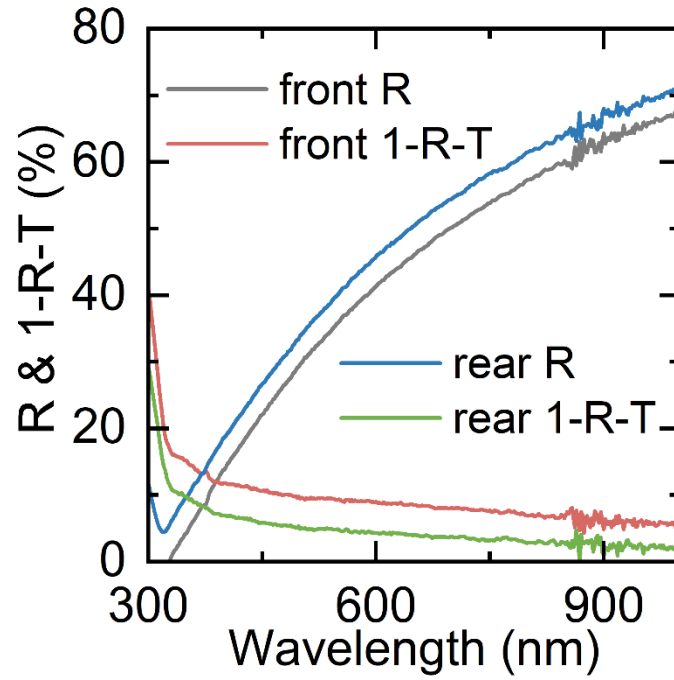

**Fig. S7. Impact of illumination direction on 1-R-T.** Reflection spectra and 1-R-T spectra of bare Ag with different illumination direction.



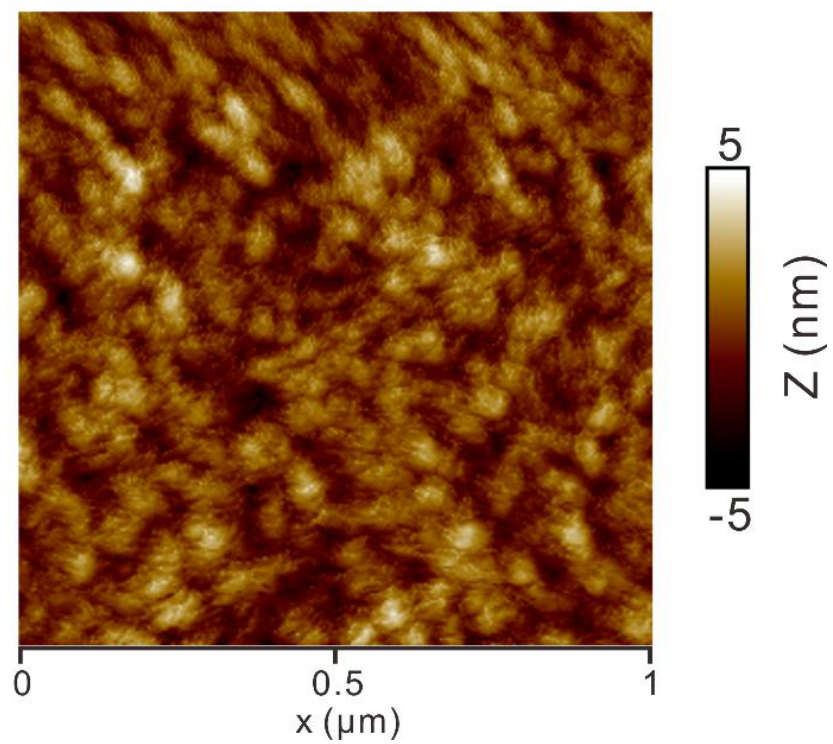

**Fig. S8. Surface morphology of active layer.** AFM height image of D18:Y6:Y6-10.

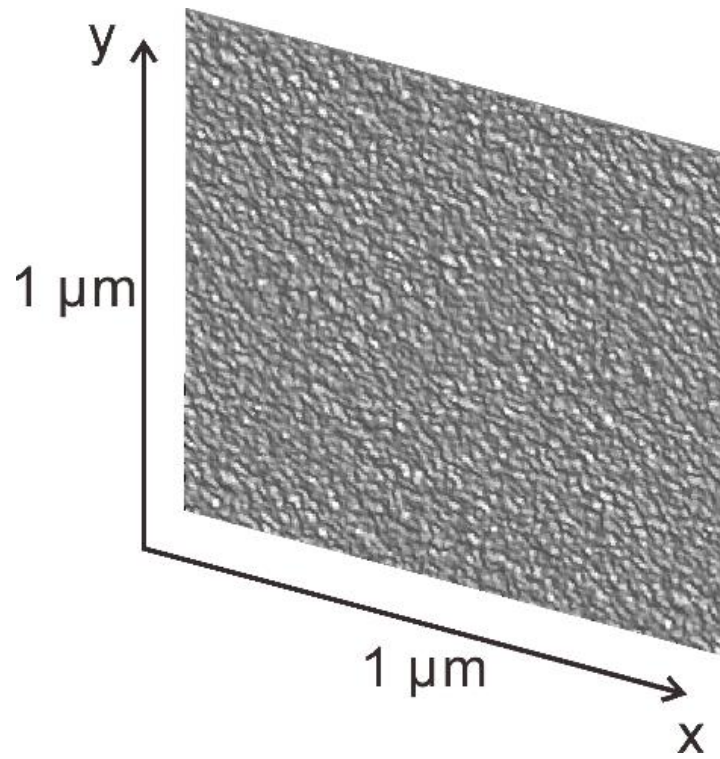

**Fig. S9. Modeling of rough Ag film.** The graph of the rough surface use in optical simulation.

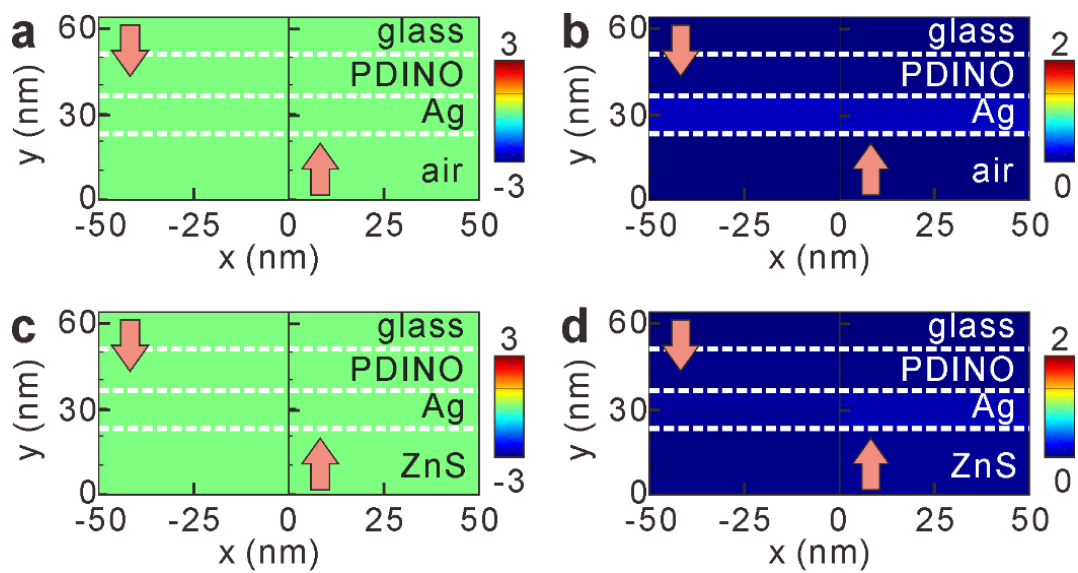

**Fig. S10. Impact of optical coupling layer on  $E_y$  and absorption distribution.** Simulated (a)  $E_y$  and (b) absorption distribution profiles of flat Ag film. Simulated (c)  $E_y$  and (d) absorption distribution profiles of flat Ag film with optical coupling layer.

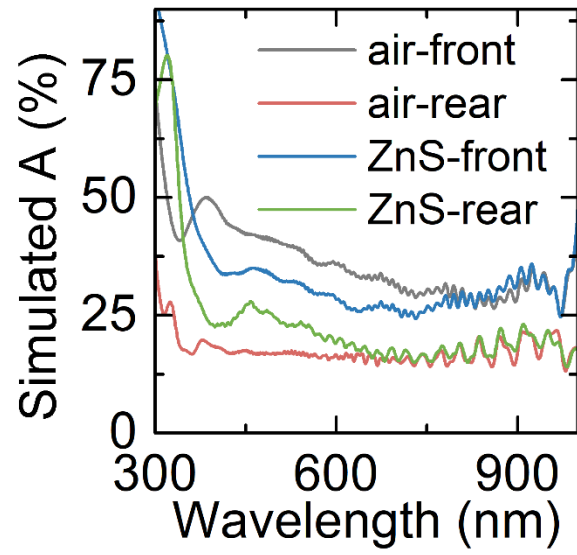

**Fig. S11. Impact of optical coupling layer on absorption.** Simulated absorption spectra of ATEs integrated with air and ZnS.

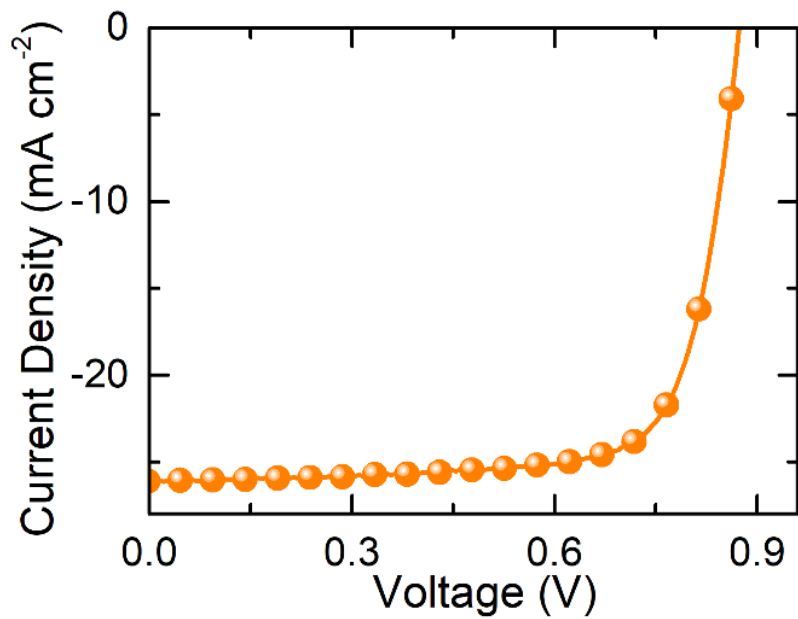

**Fig. S12. Photovoltaic performance of opaque OSC.** *J-V* curve of opaque OSC under the AM 1.5G illumination with power intensity of 100 mW cm<sup>-2</sup>.

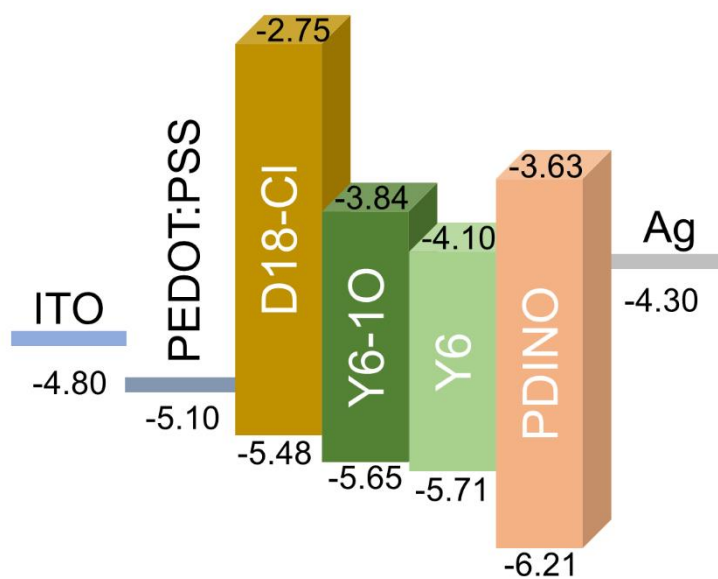

**Fig. S13. Energy level structure of OSC.** Energy level diagram of the whole device.

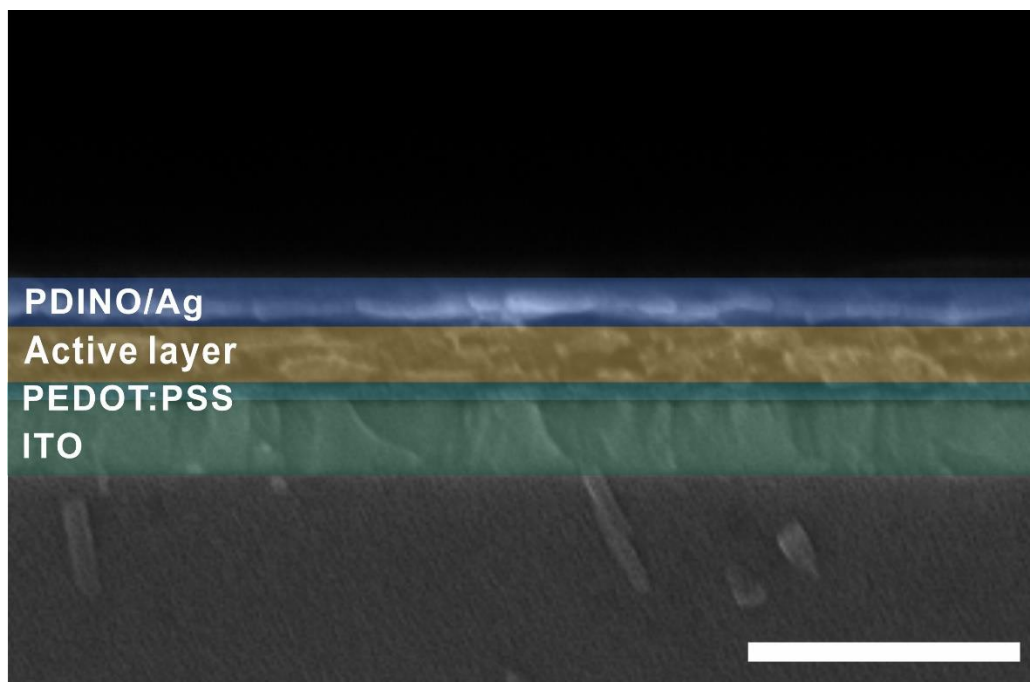

**Fig. S14. Measurements of active layer thickness.** Cross-section SEM images of bifacial OSCs under optimized conditions. The scale bar is 500 nm.

a

**CPVT**  
国家光伏质检中心

## TEST REPORT

No:2024DMCS20076



SAMPLE: Sample-front

MODEL/TYPE: BF OSC

APPLICANT: Soochow University

National Center of Inspection on Solar Photovoltaic Products Quality  
Wuxi Institute of Inspection, Testing and Certification

No:2024DMCS20076

page 2 of 4

**Test Results**

| Clause | Test item(s)                                                 | Unit | Technical requirements                                                                                                                                                                                                               | Results | Verdict<br>Pass/Fail |
|--------|--------------------------------------------------------------|------|--------------------------------------------------------------------------------------------------------------------------------------------------------------------------------------------------------------------------------------|---------|----------------------|
| 1      | Current-voltage characteristic measurement (I <sub>p</sub> ) | —    | At STC (module temperature: 25°C, irradiance: 1000W/m <sup>2</sup> , standard solar spectral irradiance distribution corresponds to IEC60904-3), measure the current-voltage characteristics of the cell with the variation of load. | —       | —                    |
| 1.1    | Open-circuit voltage, V <sub>oc</sub>                        | V    | —                                                                                                                                                                                                                                    | 0.8788  | —                    |
| 1.2    | Short-circuit current, I <sub>sc</sub>                       | mA   | —                                                                                                                                                                                                                                    | 1.910   | —                    |
| 1.3    | Maximum-power, P <sub>max</sub>                              | mW   | —                                                                                                                                                                                                                                    | 1.242   | —                    |
| 1.4    | Maximum-power voltage, V <sub>mp</sub>                       | V    | —                                                                                                                                                                                                                                    | 0.7299  | —                    |
| 1.5    | Maximum-power current, I <sub>mp</sub>                       | mA   | —                                                                                                                                                                                                                                    | 1.701   | —                    |
| 1.6    | Fill factor FF, %                                            | —    | —                                                                                                                                                                                                                                    | 73.99   | —                    |
| 1.7    | Conversion efficiency η, %                                   | —    | $\eta = \frac{P_{max}}{1000 \text{ W/m}^2 \cdot S} \times 100\%$<br>S is Sample area                                                                                                                                                 | 17.53   | —                    |

I<sub>p</sub> Current-voltage characteristic at STC

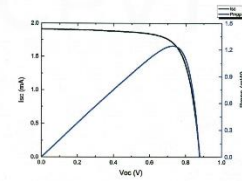

Remark: Sample area S is determined by active cell outer range, S=0.071 cm<sup>2</sup>  
Sweep direction: -0.1 V<->0 V, stepping: 0.01 V, sweep slope: 101.

b

**CPVT**  
国家光伏质检中心

## TEST REPORT

No:2024DMCS20077



SAMPLE: Sample-rear

MODEL/TYPE: BF OSC

APPLICANT: Soochow University

National Center of Inspection on Solar Photovoltaic Products Quality  
Wuxi Institute of Inspection, Testing and Certification

No:2024DMCS20077

page 2 of 4

**Test Results**

| Clause | Test item(s)                                                 | Unit | Technical requirements                                                                                                                                                                                                               | Results | Verdict<br>Pass/Fail |
|--------|--------------------------------------------------------------|------|--------------------------------------------------------------------------------------------------------------------------------------------------------------------------------------------------------------------------------------|---------|----------------------|
| 1      | Current-voltage characteristic measurement (I <sub>p</sub> ) | —    | At STC (module temperature: 25°C, irradiance: 1000W/m <sup>2</sup> , standard solar spectral irradiance distribution corresponds to IEC60904-3), measure the current-voltage characteristics of the cell with the variation of load. | —       | —                    |
| 1.1    | Open-circuit voltage, V <sub>oc</sub>                        | V    | —                                                                                                                                                                                                                                    | 0.8690  | —                    |
| 1.2    | Short-circuit current, I <sub>sc</sub>                       | mA   | —                                                                                                                                                                                                                                    | 1.496   | —                    |
| 1.3    | Maximum-power, P <sub>max</sub>                              | mW   | —                                                                                                                                                                                                                                    | 0.8993  | —                    |
| 1.4    | Maximum-power voltage, V <sub>mp</sub>                       | V    | —                                                                                                                                                                                                                                    | 0.6800  | —                    |
| 1.5    | Maximum-power current, I <sub>mp</sub>                       | mA   | —                                                                                                                                                                                                                                    | 1.323   | —                    |
| 1.6    | Fill factor FF, %                                            | —    | —                                                                                                                                                                                                                                    | 69.18   | —                    |
| 1.7    | Conversion efficiency η, %                                   | —    | $\eta = \frac{P_{max}}{1000 \text{ W/m}^2 \cdot S} \times 100\%$<br>S is Sample area                                                                                                                                                 | 12.71   | —                    |

I<sub>p</sub> Current-voltage characteristic at STC

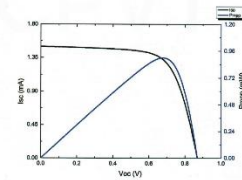

Remark: Sample area S is determined by active cell outer range, S=0.071 cm<sup>2</sup>  
Sweep direction: -0.1 V<->0 V, stepping: 0.01 V, sweep slope: 101.

**Fig. S15. Copy of bifacial OSCs certificate results by the National Center of Supervision & Inspection on Solar Photovoltaic Products Quality of China (CPVT). Certified reports of the champion bifacial OSCs under the (a) front and (b) rear illumination, respectively.**



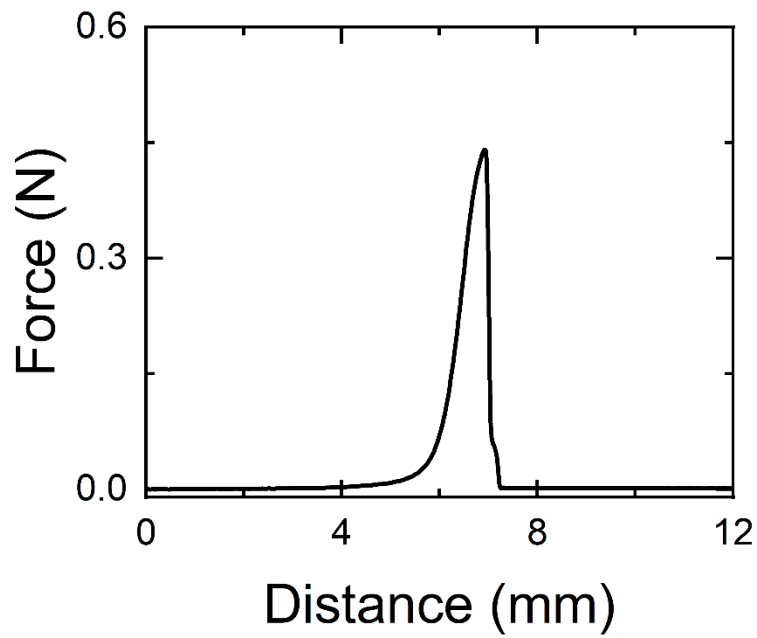

**Fig. S16. Physical contact of AOT.** Adhesion measurement between patterned PC and Ag electrode.

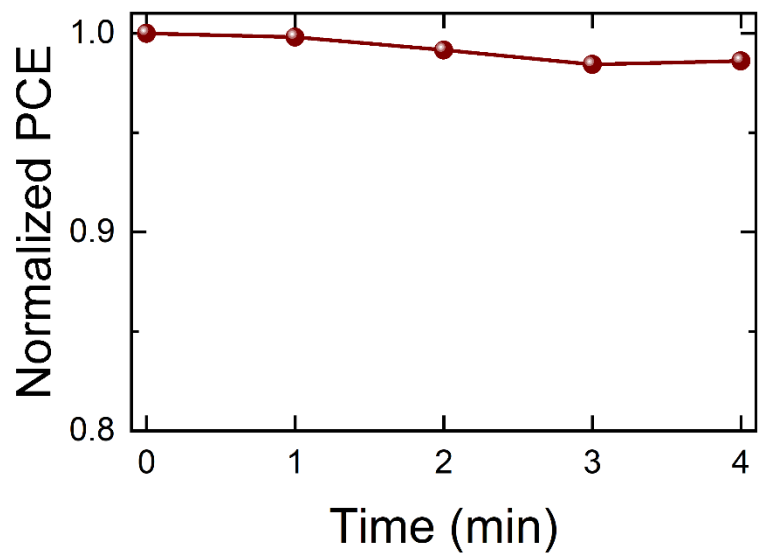

**Fig. S17. Thermal stability of bifacial OSCs.** Normalized PCE of bifacial OSCs under continuous heating at 100 °C.

**Table S1. Photovoltaic performance of bifacial OSCs.** Photovoltaic parameters for various bifacial OSCs under 100 mW cm<sup>-2</sup> AM 1.5G illumination. The average PCE (PCE<sub>ave</sub>) were obtained from 16 devices.

| <b>Rear electrode</b> | <b>Illumination direction</b> | <b><math>V_{oc}</math><br/>(V)</b> | <b><math>J_{sc}</math><br/>(mA cm<sup>-2</sup>)</b> | <b>FF<br/>(%)</b> | <b>PCE<br/>(%)</b> | <b>PCE<sub>ave</sub><br/>(%)</b> |
|-----------------------|-------------------------------|------------------------------------|-----------------------------------------------------|-------------------|--------------------|----------------------------------|
| 12 nm Ag              | Front                         | 0.87                               | 23.12                                               | 74.59             | 15.08              | 14.82                            |
|                       | Rear                          | 0.85                               | 14.73                                               | 72.61             | 9.08               | 8.76                             |
| ATE                   | Front                         | 0.87                               | 25.21                                               | 74.79             | 16.47              | 16.03                            |
|                       | Rear                          | 0.84                               | 17.09                                               | 72.29             | 10.42              | 9.7                              |
| SP-ATE                | Front                         | 0.87                               | 27.12                                               | 74.29             | 17.57              | 17.25                            |
|                       | Rear                          | 0.84                               | 21.13                                               | 72.24             | 12.75              | 12.38                            |

**Table S2. Optical characteristics of bifacial OSCs.** Optical parameters for various bifacial OSCs under 100 mW cm<sup>-2</sup> AM 1.5G illumination.

| <b>Rear electrode</b> | <b>Illumination direction</b> | <b>AVT (%)</b> | <b>PCE (%)</b> | <b>LUE (%)</b> |
|-----------------------|-------------------------------|----------------|----------------|----------------|
| 12 nm Ag              | Front                         | 13.58          | 15.08          | 2.05           |
|                       | Rear                          | 13.78          | 9.08           | 1.25           |
| ATE                   | Front                         | 3.70           | 16.47          | 0.61           |
|                       | Rear                          | 15.43          | 10.42          | 1.60           |
| SP-ATE                | Front                         | 4.56           | 17.57          | 0.80           |
|                       | Rear                          | 19.43          | 12.75          | 2.48           |

**Table S3. Photovoltaic performance of bifacial OSCs.** Photovoltaic parameters of D18:Y6(Y6-1O)-based bifacial OSCs with different D/A ratios. The average PCE ( $PCE_{ave}$ ) were obtained from 16 devices.

| <b>D/A ratio</b> | <b><math>V_{oc}</math><br/>(V)</b> | <b><math>J_{sc}</math><br/>(mA cm<sup>-2</sup>)</b> | <b>FF (%)</b> | <b>PCE<br/>(%)</b> | <b><math>PCE_{ave}</math><br/>(%)</b> |
|------------------|------------------------------------|-----------------------------------------------------|---------------|--------------------|---------------------------------------|
| 1:1.8            | 0.87                               | 29.35                                               | 75.08         | 19.26              | 18.78                                 |
| 1:1.6            | 0.88                               | 30.85                                               | 74.83         | 20.20              | 19.82                                 |
| 1:1.4            | 0.88                               | 29.85                                               | 74.13         | 19.39              | 19.01                                 |
| 1:1.2            | 0.88                               | 28.76                                               | 72.95         | 18.38              | 17.89                                 |

**Table S4. Photovoltaic performance of bifacial OSCs.** Photovoltaic parameters of D18:Y6(Y6-1O)-based bifacial OSCs with different active layer thicknesses. The average PCE ( $PCE_{ave}$ ) were obtained from 16 devices.

| <b>Thickness (nm)</b> | <b><math>V_{oc}</math><br/>(V)</b> | <b><math>J_{sc}</math><br/>(mA cm<sup>-2</sup>)</b> | <b>FF (%)</b> | <b>PCE<br/>(%)</b> | <b><math>PCE_{ave}</math><br/>(%)</b> |
|-----------------------|------------------------------------|-----------------------------------------------------|---------------|--------------------|---------------------------------------|
| 145                   | 0.87                               | 29.20                                               | 71.75         | 18.21              | 17.88                                 |
| 121                   | 0.87                               | 29.05                                               | 73.13         | 18.54              | 18.16                                 |
| 103                   | 0.88                               | 30.97                                               | 74.75         | 20.35              | 19.97                                 |
| 80                    | 0.88                               | 29.33                                               | 75.79         | 19.60              | 19.19                                 |
| 58                    | 0.88                               | 27.12                                               | 75.16         | 17.92              | 17.63                                 |

**Table S5. Photovoltaic performance of bifacial OSCs.** Photovoltaic parameters of D18:Y6(Y6-1O)-based bifacial OSCs with different additives. The average PCE ( $PCE_{ave}$ ) were obtained from 16 devices.

| <b>Additive</b> | <b><math>V_{oc}</math><br/>(V)</b> | <b><math>J_{sc}</math><br/>(mA cm<sup>-2</sup>)</b> | <b>FF (%)</b> | <b>PCE<br/>(%)</b> | <b><math>PCE_{ave}</math><br/>(%)</b> |
|-----------------|------------------------------------|-----------------------------------------------------|---------------|--------------------|---------------------------------------|
| FN              | 0.87                               | 30.08                                               | 74.98         | 19.57              | 18.98                                 |
| CN              | 0.88                               | 28.15                                               | 79.55         | 19.70              | 19.16                                 |
| DIO             | 0.85                               | 28.77                                               | 77.77         | 18.95              | 18.00                                 |
